# Supplementary material for: A photo-stable and reversible pH-responsive nano-agent based on the NIR phenazine dye for photoacoustic imaging-guided photothermal therapy
Source: Royal Society of Chemistry journal article supplement (doi:10.1039/c9cc05624f), 2019-01-01
Supplement: c9cc05624f2.pdf [file c9cc05624f2.pdf]

## Supporting information

### **Photo-stable and reversible pH-response nano-agent based on NIR phenazine dye for photoacoustic imaging-guided photothermal therapy**

Yongchao Yan,<sup>a</sup> Hao Fu,<sup>b</sup> Jian Wang,<sup>a</sup> Chuanrong Chen,<sup>b</sup> Qi Wang,<sup>a</sup> Yourong Duan,<sup>\*b</sup> Jianli Hua<sup>\*a</sup>

- a. Key Laboratory for Advanced Materials and Feringa Nobel Prize Scientist Joint Research Center, Institute of Fine Chemicals, East China University of Science and Technology, 130 Meilong Road, Shanghai 200237, PR China.
- b. State Key Laboratory of Oncogenes and Related Genes, Reiji Hospital, School of Biomedical Engineering, Shanghai Jiao Tong University, 25 Xietu Road, Shanghai 200032, PR China.

|                                                     |    |
|-----------------------------------------------------|----|
| Materials and measurements .....                    | S2 |
| Scheme S1 Synthetic routes of PIOH. ....            | S2 |
| Calculation of pKa. ....                            | S3 |
| Synthesis of PIOH-NPs.....                          | S3 |
| MTT assay .....                                     | S3 |
| Photothermal cytotoxicity of PIOH-NPs .....         | S4 |
| Photoacoustic Imaging.....                          | S4 |
| In vivo live imaging for PIOH-NP distribution.....  | S4 |
| Tumor growth inhibition study in vivo .....         | S4 |
| In vivo safety evaluation of PIOH and PIOH-NP ..... | S5 |

## Materials and measurements

Dichloromethane (DCM) was refluxed with calcium hydride and distilled before use. Ethanol (EtOH) were pre-dried over 4 Å molecular sieves before use. All other reagents and reactants were purchased as commercial products from Energy Chemical or Sigma-Aldrich and used as received without further purification.

<sup>1</sup>H NMR and <sup>13</sup>C NMR spectra were recorded on a Bruker AM 400 MHz spectrometer, and tetramethylsilane (TMS) were used as an internal standard. Electrospray ionization and time-of-flight analyzer (ESI-TOF) mass spectra were determined using a Waters Micromass LCT mass spectrometer. Absorption spectra were recorded on a Varian Cary 500 UV-vis spectrophotometer. The size distribution of the nanoparticles was measured using an ALV-5000 laser light scattering spectrometer (DLS). MTT data was measured by microreader (Model 680, Bio-Rad).

The **PH-CHO** and compound **1** was synthesized according to previous report.<sup>[1]</sup>

MDA-MB-231 cells (human breast cancer cells) were obtained from the Type Culture Collection of the Chinese Academy of Sciences, Shanghai, China. FBS (fetal calf serum) and DMEM (dulbecco's modified eagle medium) were procured from Gibco. Nude BALB/c mice were purchased from the Animal Experiment Centre of Shanghai Cancer Institute. All of the animal experimental procedures were performed according to the protocols approved by the Animal Care and Use Committee of the Shanghai Cancer Institute.

### Scheme S1 Synthetic routes of **PIOH**.

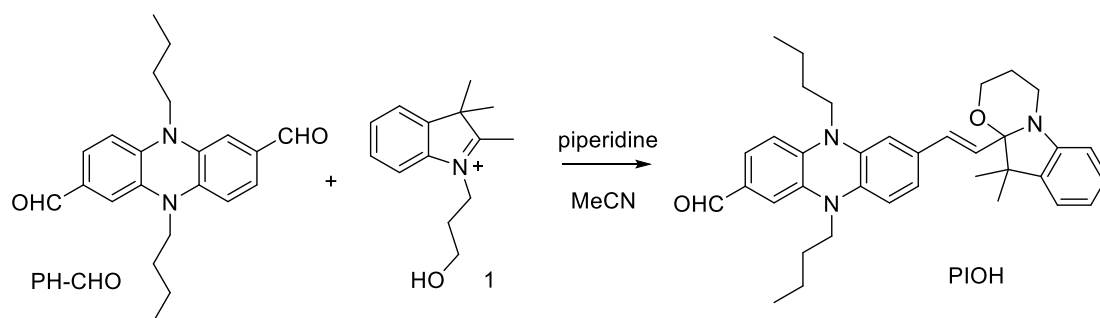

Synthesis of **PIOH**. **PH-CHO** (196 mg, 0.56 mmol) and 3H-Indolium, 1-(3-hydroxypropyl)-2,3,3-trimethyl-, iodide (205 mg, 0.59 mmol) was dissolved in 15 mL acetonitrile. Then, a drop of piperidine was added into the solution. Subsequently, the mixture was heated to 80 °C under the protection of argon for 10 hours. **PIOH** (54.3 mg, 17.6%) was purified by silica gel chromatography (CH<sub>2</sub>Cl<sub>2</sub>/alcohol, v: v = 12:1) then recrystallized in basic aqueous solution. <sup>1</sup>H NMR (400 MHz, CDCl<sub>3</sub>) δ 9.57 (s, 1H), 7.16 (t, *J* = 7.3 Hz, 1H), 7.08 (d, *J* = 7.0 Hz, 1H), 7.04 (d, *J* = 8.1 Hz, 1H), 6.84 (t, *J* = 7.3 Hz, 1H), 6.78 (d, *J* = 7.5 Hz, 1H), 6.66 (d, *J* = 7.8 Hz, 1H), 6.64 – 6.58 (m, 2H), 6.42 (s, 1H),

6.25 (d,  $J = 7.2$  Hz, 2H), 5.97 (d,  $J = 16.4$  Hz, 1H), 3.79 – 3.51 (m, 4H), 3.49 – 3.38 (m, 4H), 1.66 (ddd,  $J = 16.6, 11.6, 7.6$  Hz, 6H), 1.52 – 1.45 (m, 4H), 1.32 (s, 3H), 1.25 (s, 3H), 1.06 – 1.01 (m, 6H).  $^{13}\text{C}$  NMR (101 MHz, DMSO- $d_6$ +CF $_3$ COOD)  $\delta$  190.07, 170.15, 142.89, 141.64, 141.59, 141.24, 134.39, 129.97, 129.60, 129.55, 128.88, 128.01, 122.90, 113.85, 111.49, 111.13, 109.98, 106.95, 78.40, 66.29, 51.24, 44.41, 42.93, 32.87, 31.04, 28.95, 26.24, 20.46, 20.41, 19.28, 19.25, 13.79, 13.67. MS (ESI, m/z):  $[\text{M}]^+$  calcd for C $_{36}$ H $_{44}$ N $_3$ O $_2^+$ : 550.3434; found: 550.3436.

### Calculation of pKa.

pKa of PIOH was calculated by formula:

$$\log[(A_{\max} - A)/(A - A_{\min})] = \text{pH} - \text{pKa}$$

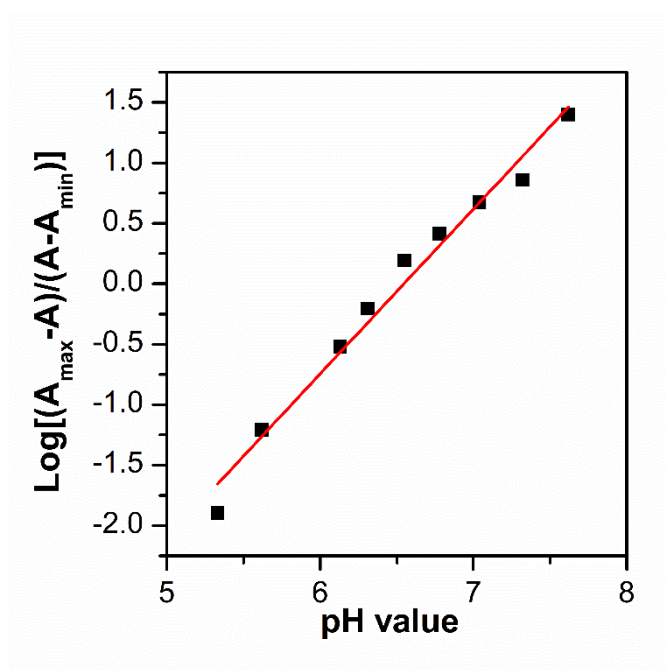

### Synthesis of PIOH-NPs

1.0 mg PIOH, 5.0 mg cholesterol and 20.0 mg soya bean lectihin was dissolved in 1.0 mL dichloromethane. The solution was emulsified with 3.0 mL ultrapure water. Then the dichloromethane was removed in vacuo.

### MTT assay

MDA-MB-231/MCF-7 cells were seeded to 96 well plate ( $1 \times 10^4$  per well), and hatched in DEME culture medium (contain 10% fetal calf serum) for 24 hours. PIOH-NPs were attenuated with culture medium to get different concentration solution (2.25  $\mu\text{M}$ , 4.5  $\mu\text{M}$ , 9  $\mu\text{M}$ , 18  $\mu\text{M}$ , 36  $\mu\text{M}$ ) and replacing previous medium. Cells were hatched in medium with PIOH-NPs for another 24 h. The methyl thiazolyl tetrazolium (MTT) assay was utilized to evaluate the cytotoxicity of PIOH-NPs.

Subsequently, cells were cultured with MTT (150  $\mu$ L, 0.5 mg/mL) for 4 hours. The absorbance of each well was measured under a 490 nm laser by a microplate reader (Bio-Rad Laboratories Inc, Hercules, CA, USA).

The relative growth rate of the cells (RGR) was determined by the following equation:

$$\text{RGR \%} = (\text{OD}_{\text{sample}} - \text{OD}_{\text{blank}} / \text{OD}_{\text{control}} - \text{OD}_{\text{blank}}) \times 100\%$$

### **Photothermal cytotoxicity of PIOH-NPs**

MDA-MB-231 cells were seeded to 96 well plate ( $1 \times 10^4$  per well), and hatched in DEME culture medium (contain 10% fetal calf serum) for 24 hours. Then the medium was replaced with PIOH-NPs solutions (pH =6.0 and pH =7.4) and exposed to laser (808 nm, 1W/cm<sup>2</sup>) for different time. Subsequently, cells were hatched in fresh medium for another 24 h. The methyl thiazolyl tetrazolium (MTT) assay was utilized to evaluate the cytotoxicity of **PIOH-NPs**. Subsequently, cells were cultured with MTT (150  $\mu$ L, 0.5 mg/mL) for 4 hours. The absorbance of each well was measured under a 490 nm laser by a microplate reader (Bio-Rad Laboratories Inc, Hercules, CA, USA).

Photothermal cytotoxicity of **PIOH-NPs** was also measured by AM-PI assay via fluorescence microscope imaging. The experiment was divided into three groups, control group and experiment group. MCF-7 cells were seeded in petri dishes at a density of  $5 \times 10^4$  cells per dishes. In experiment group, cells were treated by **PIOH-NPs** (30  $\mu$ M) at pH = 7.4 and pH = 6.0, then exposed to 808 nm laser (1 W/cm<sup>2</sup>) for 10 min, while in control group, cells were exposed to 808 nm laser without NPs. Cells were further co-stained with 10  $\mu$ g Calcine AM (AM) and 200 nM prodidium iodide (PI).

### **Photoacoustic Imaging**

**PIOH-NPs** solution (300  $\mu$ L, 0.6 mM) were injected in tail vein. Then the tumor of nudes were imaged by VEVO Lazer at different time point (0h, 3h, 7h, 24h).

### **In vivo live imaging for PIOH-NP distribution**

The mice were divided into three groups randomly (n = 3). Free Dir and Dir-NPs were administered by intravenous injection when the volume of the tumor reached 100 mm<sup>3</sup>. Then, at 1, 4, 24, 48 and 72 h post-injection, the nude mice were anesthetized by Isoflurane, and fluorescence indicating the PIOH-NP was observed using *in vivo* imaging device (LB983, Berthold Technologies GmbH & Co. KG, Bad Wildbad, Germany). After that, the nude mice were separately sacrificed. The heart, liver, spleen, lung, kidney, tumor or subcutaneous tissue were harvested and observed.

### **Tumor growth inhibition study in vivo**

The animal models were Balb/c background female nude mice purchased in a pathogen-free animal

room of Fu Dan University (Shanghai, China). The BALB/C mice (4–6 weeks old, 18–22 g, Female) were obtained from Shanghai SLAC Laboratory Animal (Shanghai, China). The SMMC-7721 subcutaneous hepatic cancer tumor model was created as described by previous reports. Briefly, the 7721 cells were subcutaneously injected ( $1.5 \times 10^6$ , 100  $\mu$ l in PBS) in the right forelimb of the nude mice. The mice were randomly divided into 6 groups (n=5) until the tumor volume grew to approximately 100 mm<sup>3</sup>. Then the mice were randomly divided into 5 groups and treated with PBS, Laser, **PIOH** + Laser, **PIOH-NP** and **PIOH-NP** + Laser through intravenous injection. The body weight and tumor size of each mouse were measured at day 3, 5, 8 and 16. Afterwards, the relative tumor volumes were obtained by equations at following:

$$\text{Tumor volume (V)} \quad V = ab^2/2$$

$$\text{Relative tumor volume (RTV)} = V_t / V_C$$

Where  $V_t$  and  $V_C$  are the tumor volume after the different treatment and the volume of the untreated tumor in PBS, respectively. And a and b represent long and short diameters, respectively, of the tumor.

### In vivo safety evaluation of **PIOH** and **PIOH-NP**

The treated nude mice were sacrificed at day 16. Serum samples were collected by retro-orbital bleeding and measured to assess hepatic and renal damage. Tissues from the heart, liver, spleen, lung, kidney and tumor were subsequently analyzed by HE staining sections.

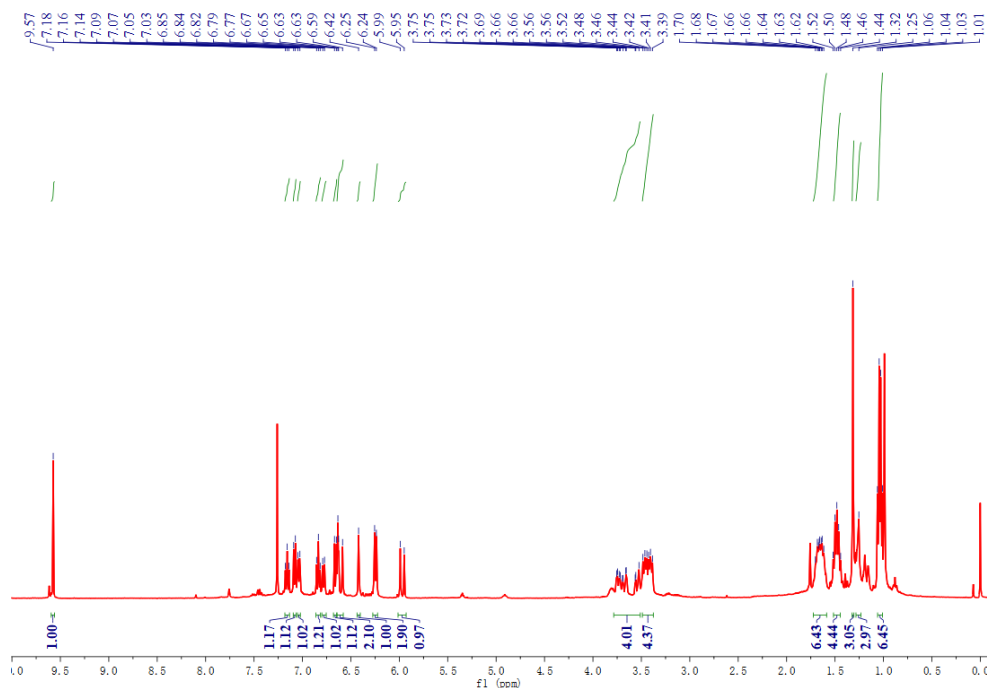

Fig. S1 <sup>1</sup>H NMR spectrum of **PIOH** in CDCl<sub>3</sub>.

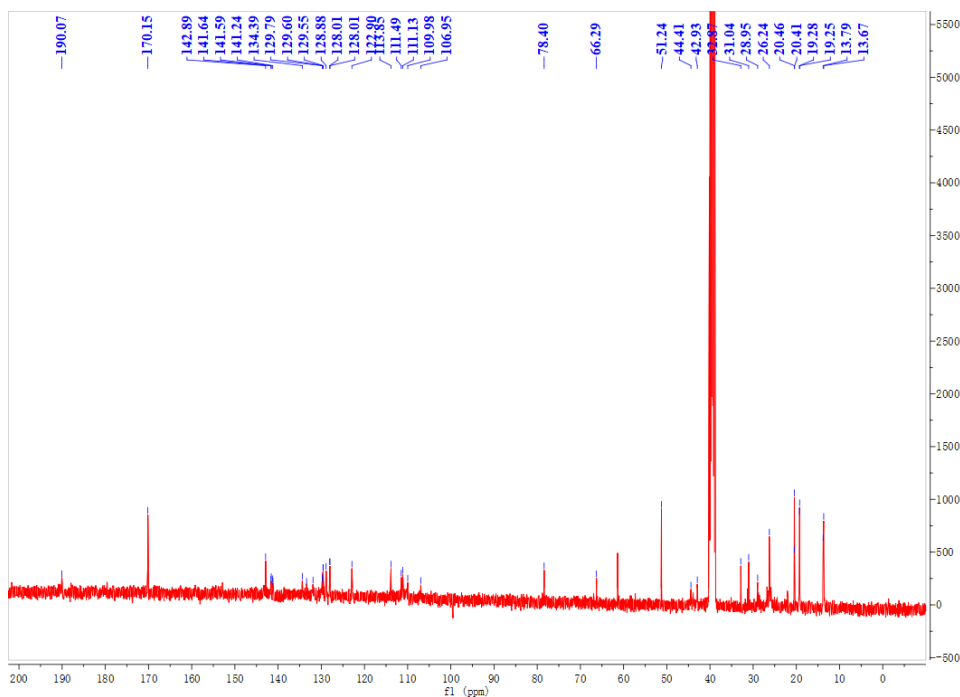

Fig. S2  $^{13}\text{C}$  NMR spectrum of **PIOH** in  $\text{DMSO-}d_6 + \text{CF}_3\text{COOD}$ .

Elemental Composition Report

Page 1

Single Mass Analysis

Tolerance = 30.0 PPM / DBE: min = -1.5, max = 100.0

Element prediction: Off

Number of isotope peaks used for i-FIT = 3

Monoisotopic Mass, Even Electron Ions

7 formula(e) evaluated with 1 results within limits (up to 1 best isotopic matches for each mass)

Elements Used:

C: 0-36 H: 0-50 N: 0-3 O: 0-2

JL-HUA

ECUST institute of Fine Chem

16-Nov-2017

21:15:03

1: TOF MS ES+

4.01e+003

HL-YYC-5311 29 (0.456) Cm (28:30)

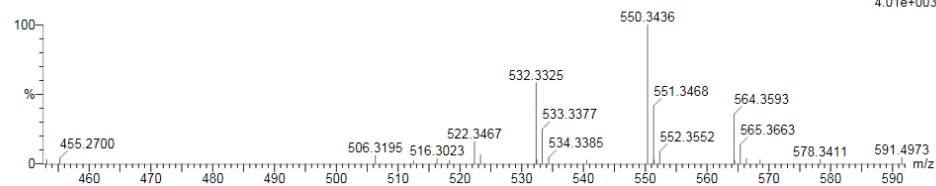

| Mass     | Calc. Mass | mDa | PPM | DBE  | i-FIT | i-FIT (Norm) | Formula                                                       |
|----------|------------|-----|-----|------|-------|--------------|---------------------------------------------------------------|
| 550.3436 | 550.3434   | 0.2 | 0.4 | 16.5 | 19.5  | 0.0          | C <sub>36</sub> H <sub>44</sub> N <sub>3</sub> O <sub>2</sub> |

Fig. S3 High resolution mass spectrum of **PIOH**.

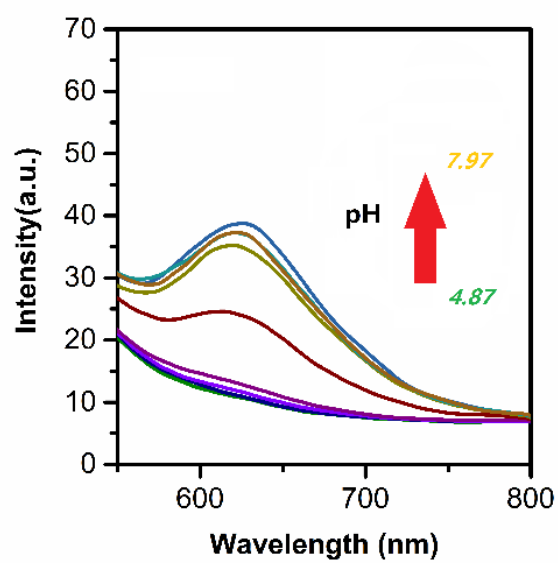

Fig. S4 fluorescence spectra in different pH buffer solution (DMSO: BR buffer=3:7, 10  $\mu$ M),  $\lambda_{ex}=525$  nm

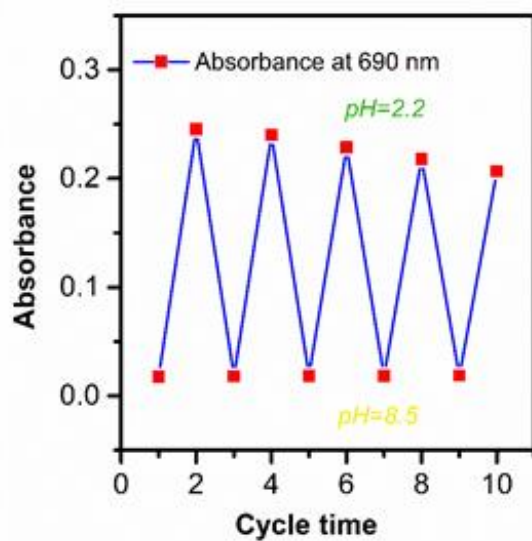

Fig. S5 Reversible change of absorbance at 690 nm of PIOH between pH 8.5 and pH 2.2

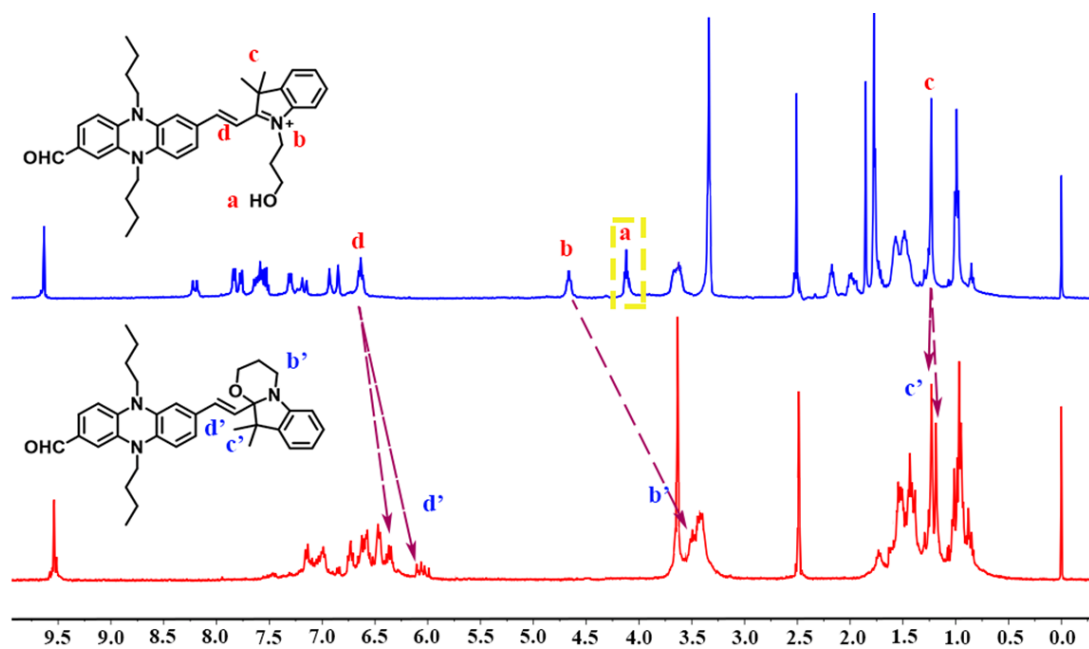

Fig. S6  $^1\text{H}$  NMR spectra of PIOH in acid (DMSO- $d_6$ +CH $_3$ COOH) and basic (DMSO- $d_6$ +NaOD in D $_2$ O) surrounding.

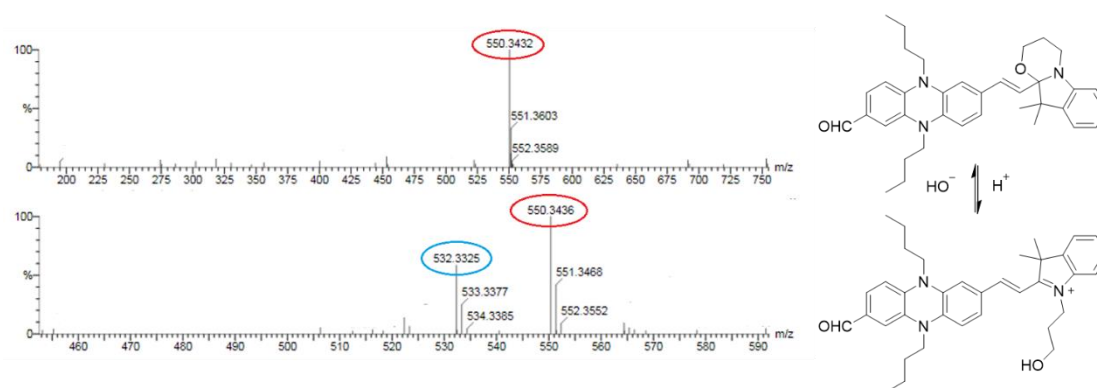

Fig. S7 High resolution mass spectrum of PIOH in alkaline and acidic solution.



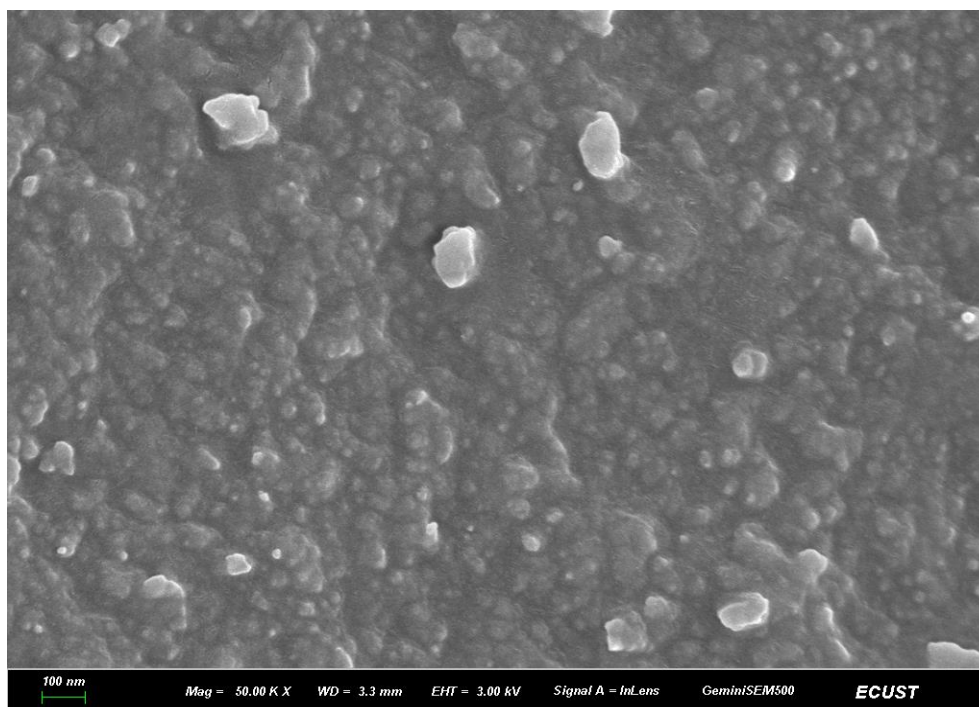

Fig. S8 SEM image of **PIOH-NPs**

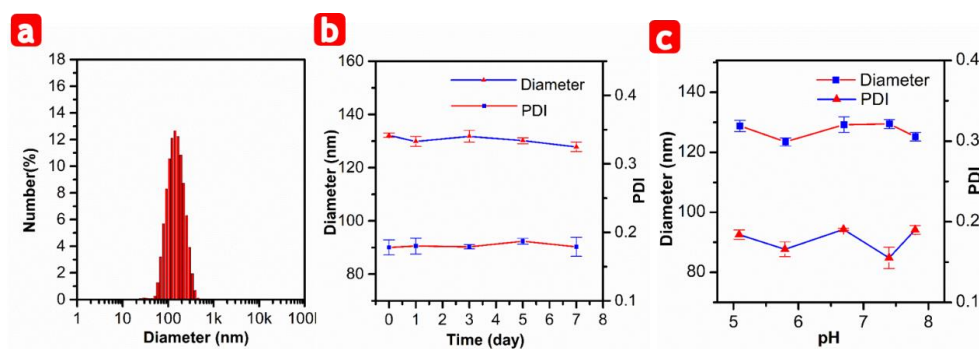

Fig. S9 (a) DLS size distribution of **PIOH-NPs** in pure water. The diameter and PDI of **PIOH-NPs** at different days (b) and in different pH buffers (c).

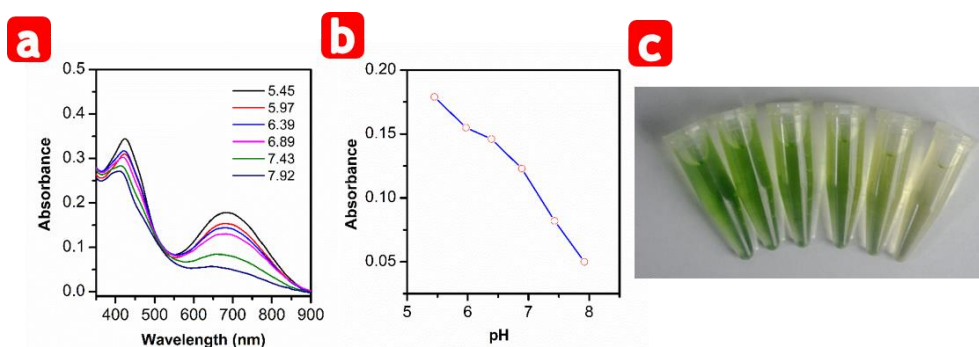

Fig. S10 Absorbance (A) and absorbance at 690 nm (B) of **PIOH-NPs** in different pH buffer solution. Photography of **PIOH-NPs** in different pH buffer solution.

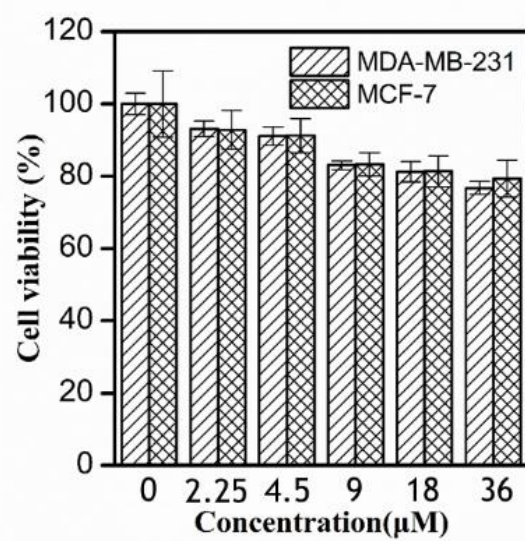

Fig. S11 Cell viability of different concentration **PIOH-NPs**.

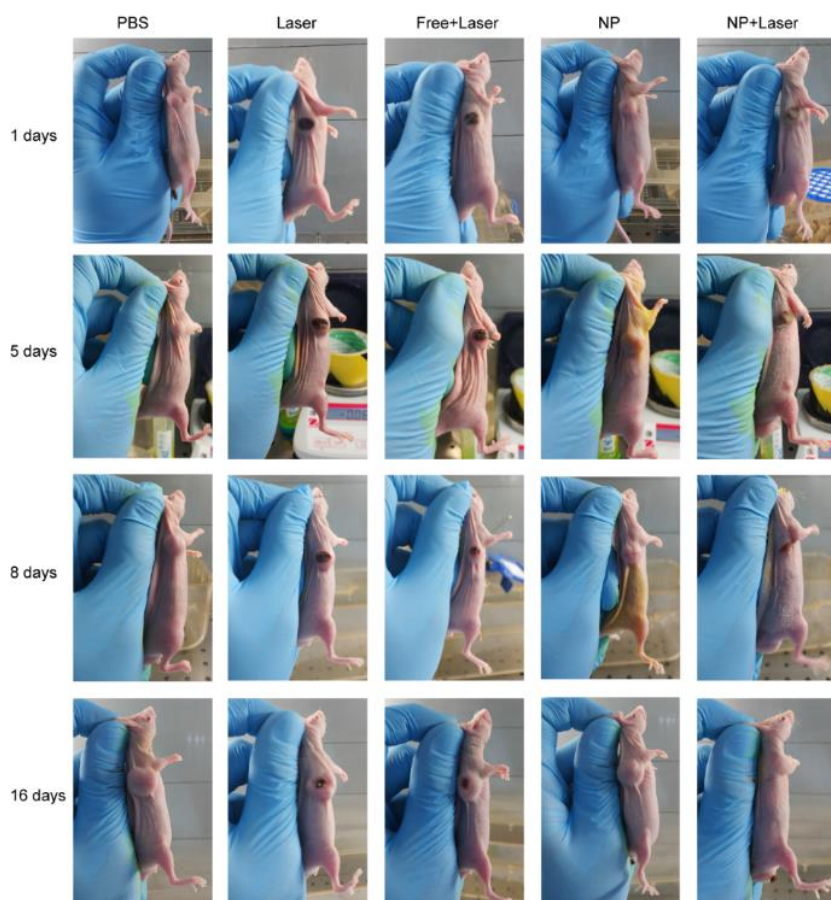

Fig. S12 Photography of mice in every group at different time point.

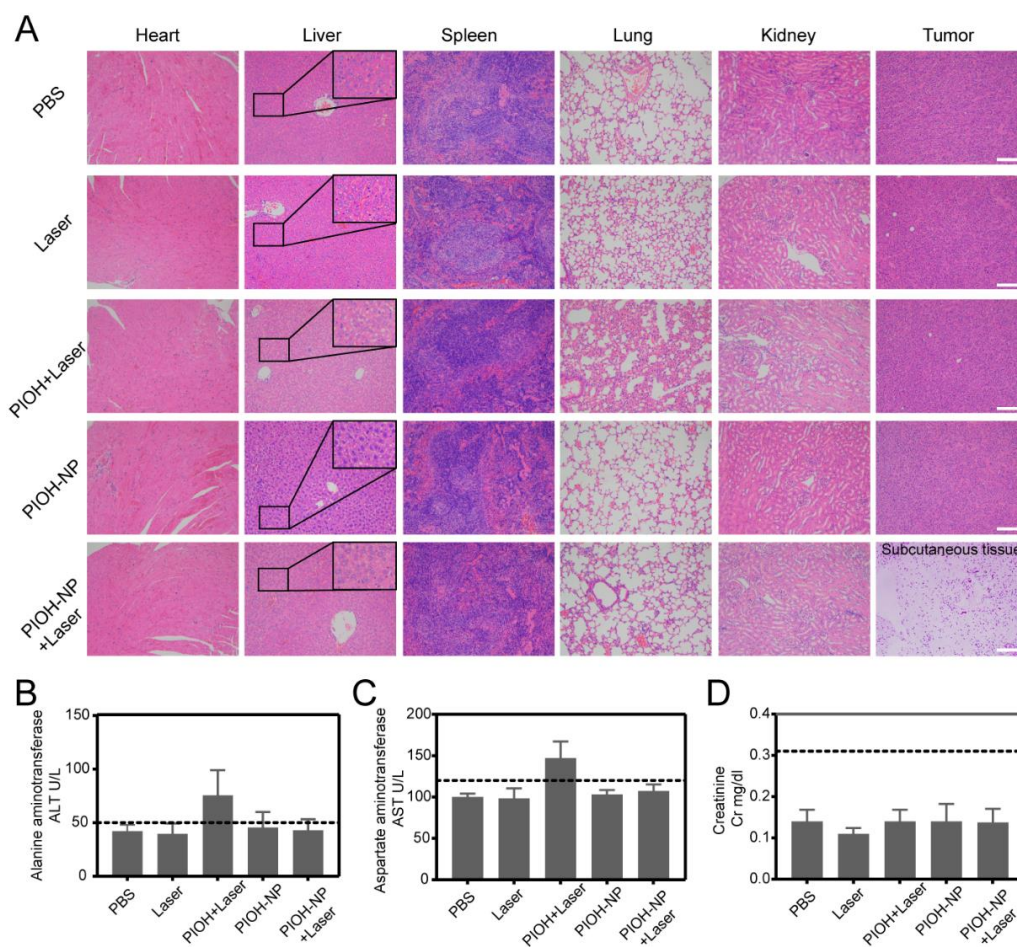

Fig. S13 Biosafety evaluation of PIOH-NP. (A) HE sections of main organs from treated groups. Liver function evaluation presented by (B) Serum ALT (U/L) detection and (C) Serum AST (U/L) detection from different treated groups. Kidney function evaluation presented by (D) Serum Cr detection from different treated mice.

- [1] a) L. Yang, X. Li, Y. Qu, W. Qu, X. Zhang, Y. Hang, H. Ågren, J. Hua, *Sensors and Actuators B: Chemical* **2014**, *203*, 833-847; b) C. Beyer, H. A. Wagenknecht, *J. Org. Chem.* **2010**, *75*, 2752-2755.
